# Supplementary material for: Controllable and facile preparation of Co9S8–Ni3S2 heterostructures embedded with N,S,O-tri-doped carbon for electrocatalytic oxidation of 5-hydroxymethylfurfural
Source: Royal Society of Chemistry journal article supplement (doi:10.1039/d1gc04499k), 2022-01-01
Supplement: d1gc04499k1.pdf [file d1gc04499k1.pdf]

Electronic Supplementary Information for

**Controllable and facile preparation of Co<sub>9</sub>S<sub>8</sub>-Ni<sub>3</sub>S<sub>2</sub> heterostructures  
embedded in N,S,O-*tri*-doped carbon for electrocatalytic oxidation of  
5-hydroxymethylfurfural**

Yibin Zhang,<sup>a</sup> Zhimin Xue,<sup>a\*</sup> Xinhui Zhao,<sup>b</sup> Baolong Zhang<sup>b</sup> and Tiancheng Mu<sup>b\*</sup>

<sup>a</sup>Beijing Key Laboratory of Lignocellulosic Chemistry, College of Materials Science and Technology, Beijing Forestry University, Beijing 100083, P. R. China. E-mail: zmxue@bjfu.edu.cn

<sup>b</sup>Department of Chemistry, Renmin University of China, Beijing 100872, P. R. China. E-mail: tcmu@ruc.edu.cn

## Materials

5-hydroxymethylfurfural (HMF), 5-hydroxymethyl-2-furancarboxylic acid (HMFCFA), 2,5-diformylfuran (DFF), 5-formyl-2-furan-carboxylic acid (FFCA), 2,5-furandicarboxylic acid (FDCA) and ammonium formate were purchased from Innochem Science & Technology Co., Ltd (Beijing, China). Cobalt chloride hexahydrate ( $\text{CoCl}_2 \cdot 6\text{H}_2\text{O}$ , AR,  $\geq 99.5\%$ ), nickel (II) chloride hexahydrate ( $\text{NiCl}_2 \cdot 6\text{H}_2\text{O}$ , AR,  $\geq 99.5\%$ ), thiourea, polyethylene glycol 200 (PEG200) and potassium hydroxide (KOH, AR,  $\geq 99.5\%$ ) were received from Aladdin Reagents Co., Ltd (Shanghai, China). All the chemicals were used as received without purification. Nafion was purchased from Shanghai Macklin Biochemical Co., Ltd. The nickel foam (NF) with a purity  $> 99.99\%$  was purchased from Sheng Qiang Co., Ltd (Jiangsu, China). The NF was cleaned with 3 M hydrochloric acid, ethanol, and deionized water for 10 minutes each before use.

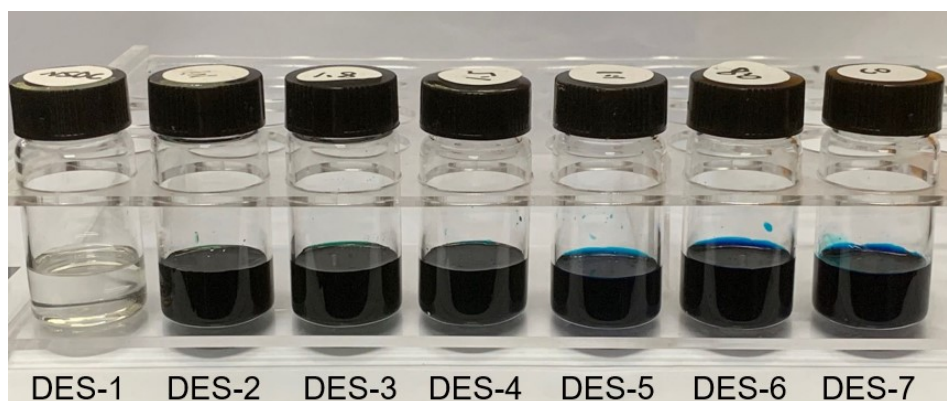

**Fig. S1.** Schematic diagram of deep eutectic solvents (DESs) with different ratios of nickel and cobalt.

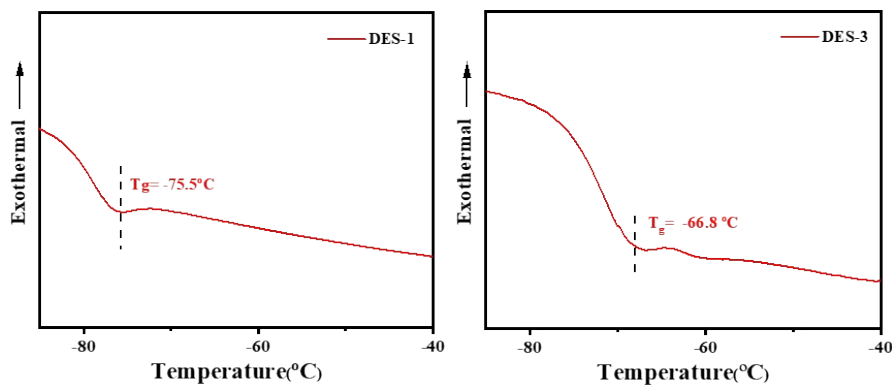

**Fig. S2.** Differential Scanning Calorimeter (DSC) spectra of deep eutectic solvents of DES-1 and DES-3 (PEG200,  $T_g = -65\text{ }^\circ\text{C}$ ; Thiourea,  $T_g = 170\text{ }^\circ\text{C}$ ; Cobalt chloride hexahydrate,  $T_g = 86\text{ }^\circ\text{C}$ ; Nickel (II) chloride hexahydrate,  $T_g = 140\text{ }^\circ\text{C}$ ).

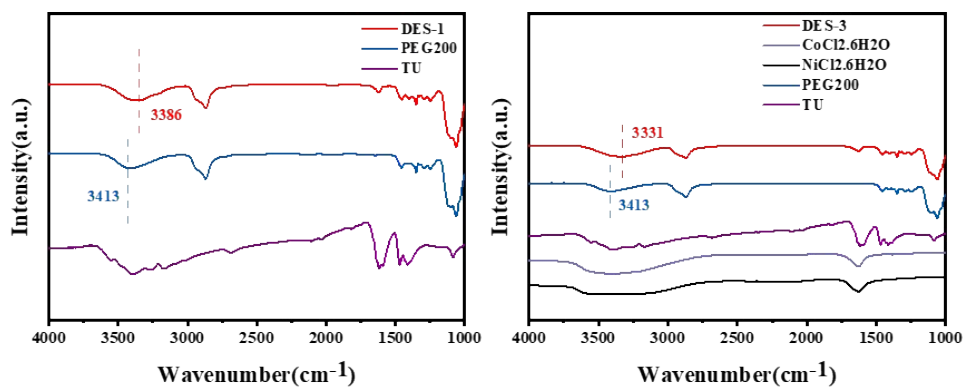

**Fig. S3.** FT-IR spectra of DES-1, DES-2, TU, PEG 200,  $\text{NiCl}_2 \cdot 6\text{H}_2\text{O}$  and  $\text{CoCl}_2 \cdot 6\text{H}_2\text{O}$ .

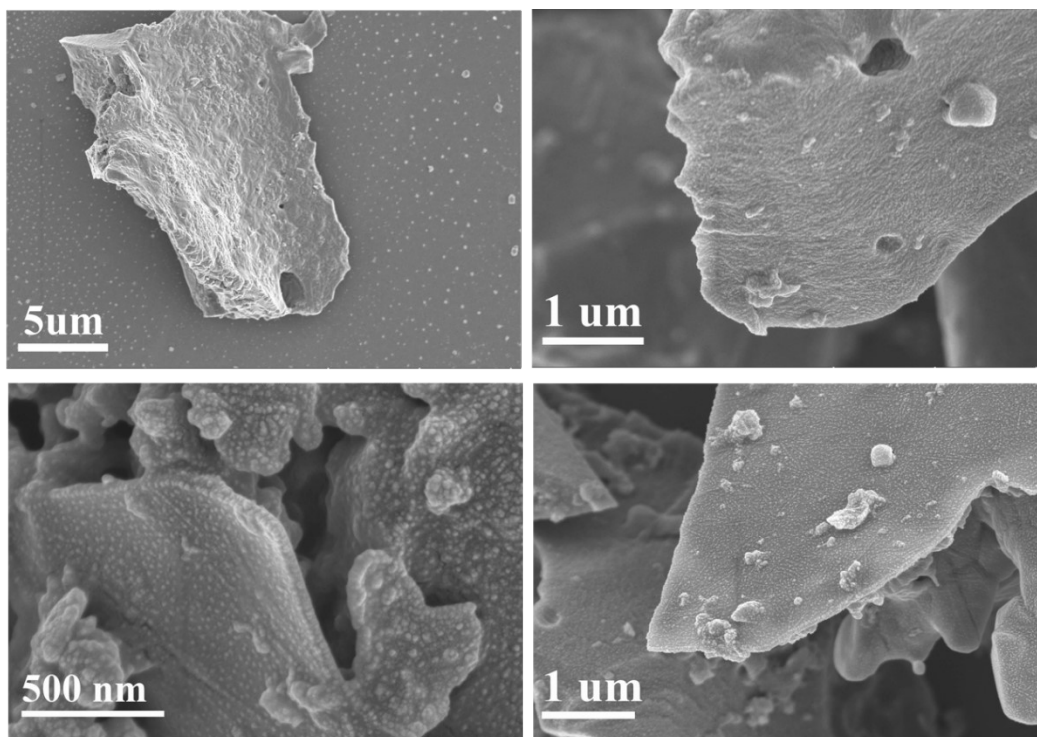

**Fig. S4.** SEM images of DES-1 after one-step pyrolysis strategy (NSOC).

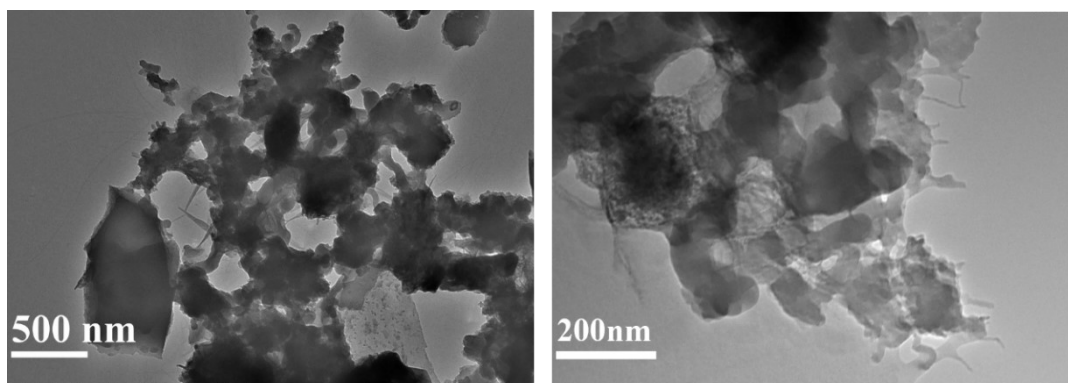

**Fig. S5.** TEM images of NSOC.

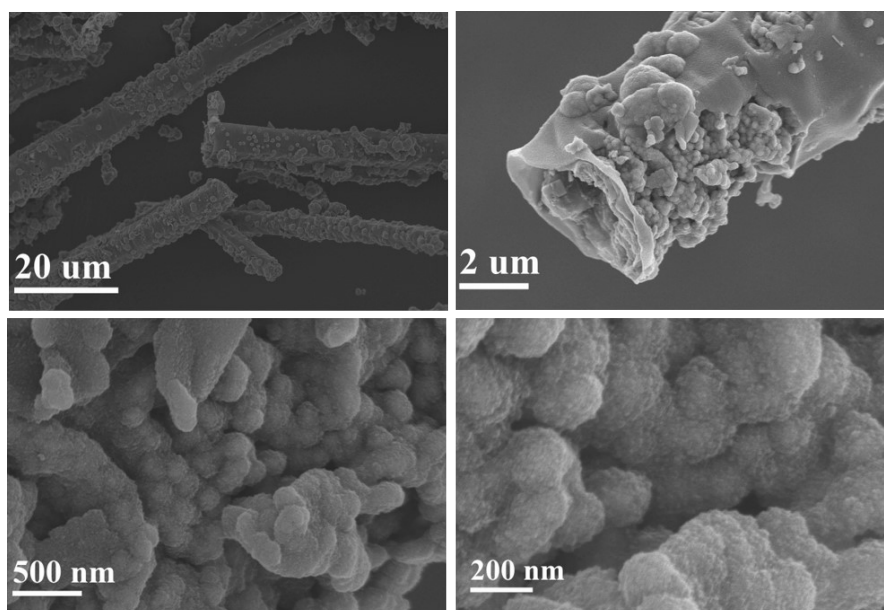

**Fig. S6.** SEM images of DES-2 after one-step pyrolysis and sulfuration strategy ( $\text{Ni}_3\text{S}_2@\text{NSOC}$ ).

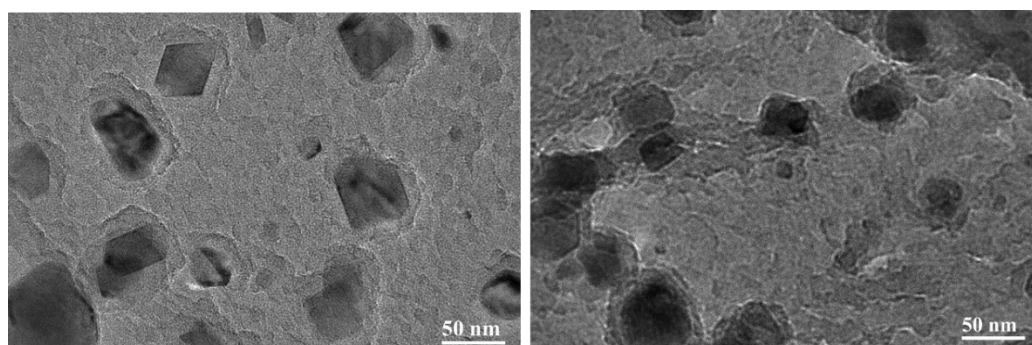

**Fig. S7.** TEM images of  $\text{Ni}_3\text{S}_2@\text{NSOC}$ .

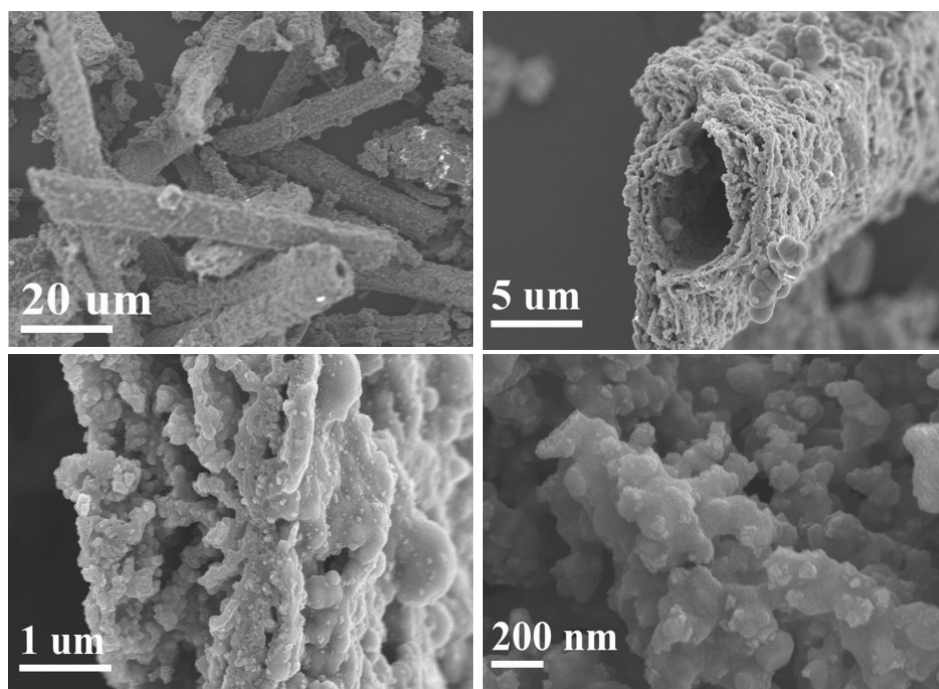

**Fig. S8.** SEM images of DES-3 after one-step pyrolysis and sulfuration strategy ( $\text{Co}_9\text{S}_8\text{-Ni}_3\text{S}_2\text{@NSOC}$ ).

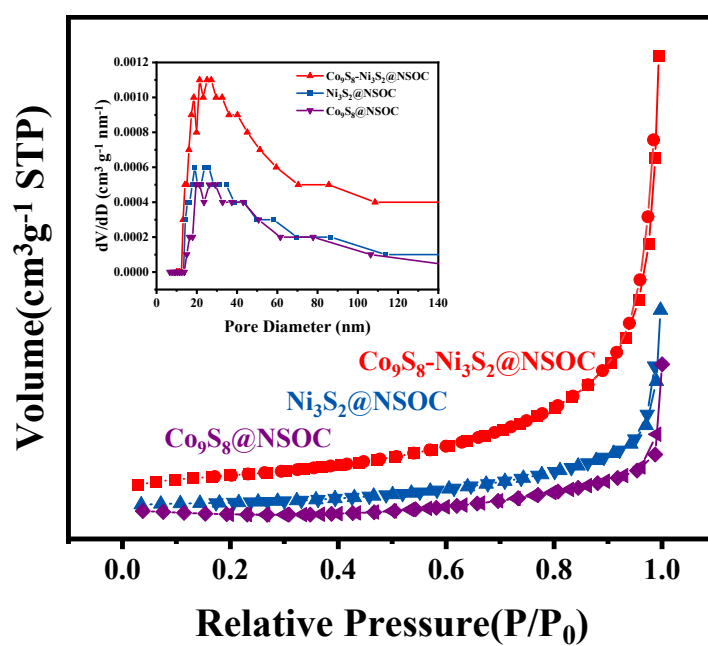

**Fig. S9.**  $\text{N}_2$  adsorption-desorption isotherms (inset: pore size distribution) of  $\text{Co}_9\text{S}_8\text{@NSOC}$ ,  $\text{Ni}_3\text{S}_2\text{@NSOC}$ , and  $\text{Co}_9\text{S}_8\text{-Ni}_3\text{S}_2\text{@NSOC}$ .

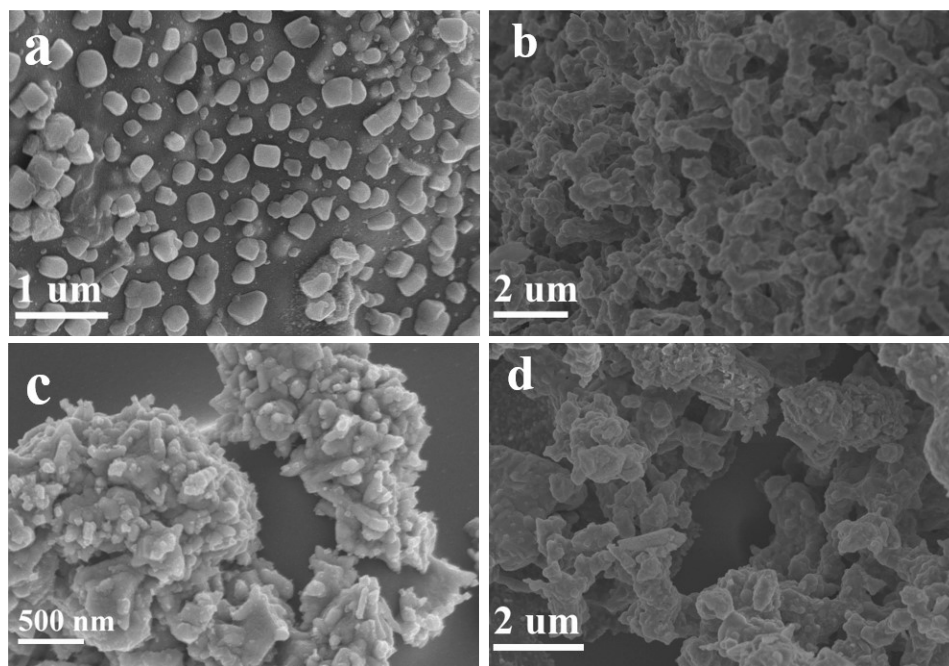

**Fig. S10.** SEM images of a) DES-4, b) DES-5, c) DES-6, d) DES-7 after one-step pyrolysis and sulfuration strategy.

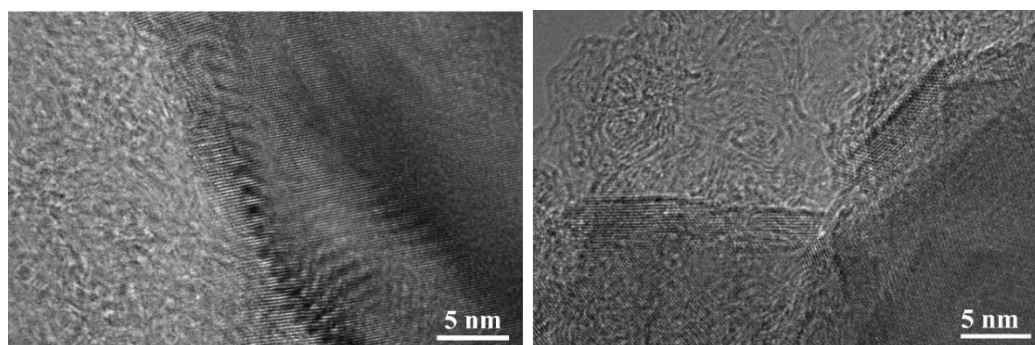

**Fig. S11.** HRTEM images of  $\text{Co}_9\text{S}_8\text{-Ni}_3\text{S}_2@\text{NSOC}$ .

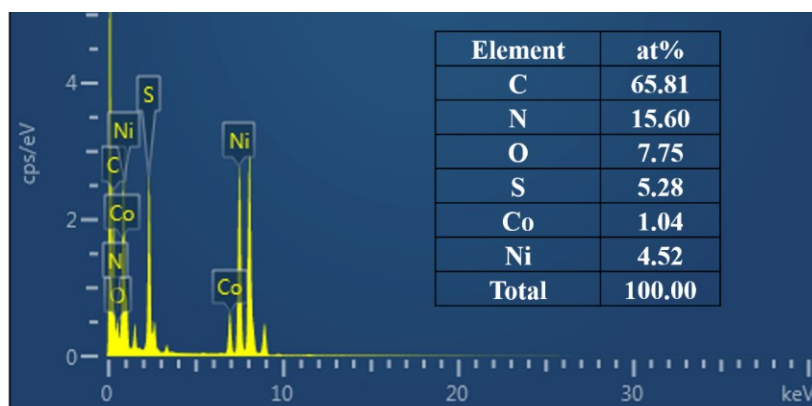

**Fig. S12.** Energy dispersive spectroscopy (EDS) of  $\text{Co}_9\text{S}_8\text{-Ni}_3\text{S}_2@\text{NSOC}$ .

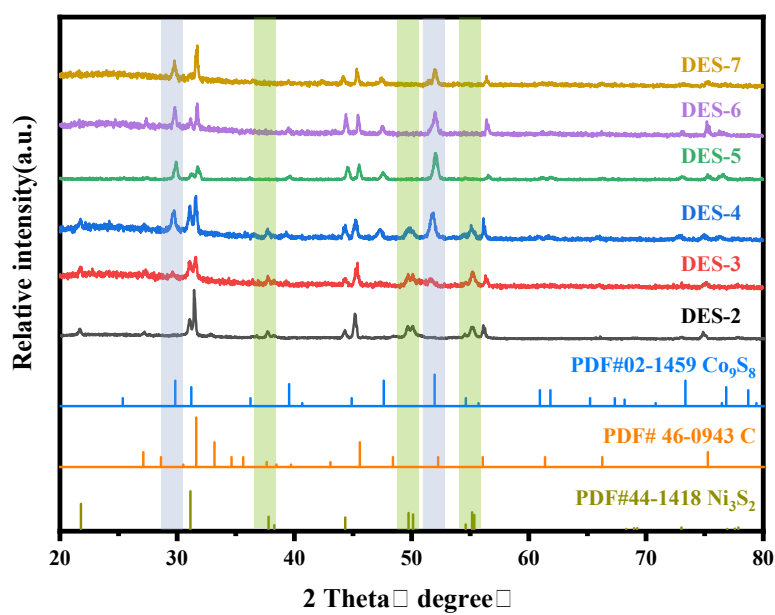

**Fig. S13.** PXRD patterns of the samples obtained from DES at different molar ratio (DES-2~DES-7 as precursors, 3 h, 400 °C).



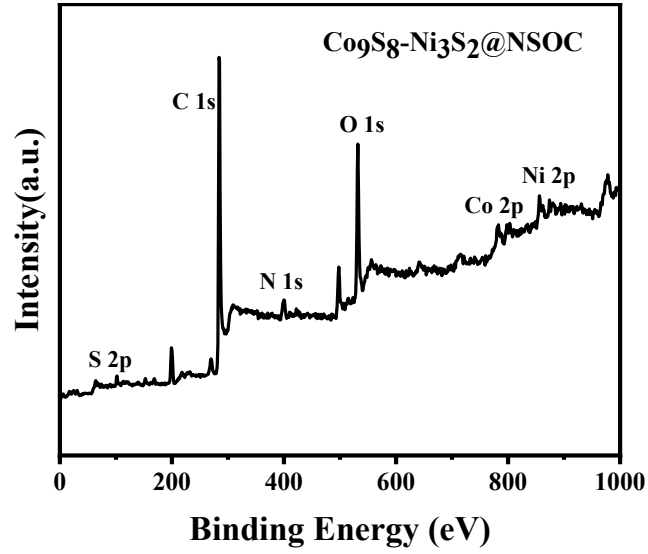

**Fig. S14.** XPS survey spectrum of  $\text{Co}_9\text{S}_8\text{-Ni}_3\text{S}_2\text{@NSOC}$  hybrid.

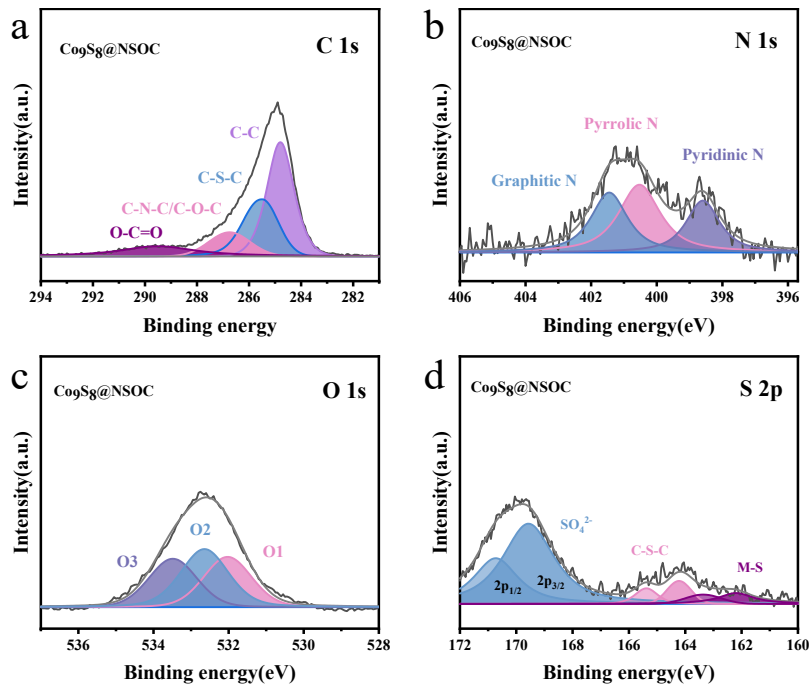

**Fig. S15.** XPS spectra of (a) C 1s, (b) N 1s, (c) O 1s and (d) S 2p for  $\text{Co}_9\text{S}_8\text{@NSOC}$ .

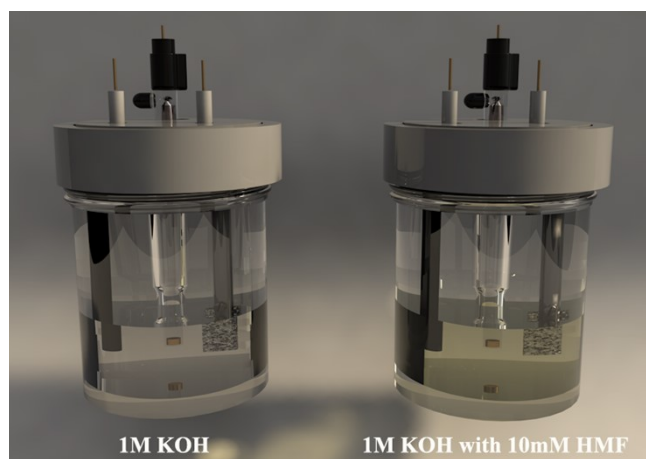

**Fig. S16.** Typical three-electrode model.

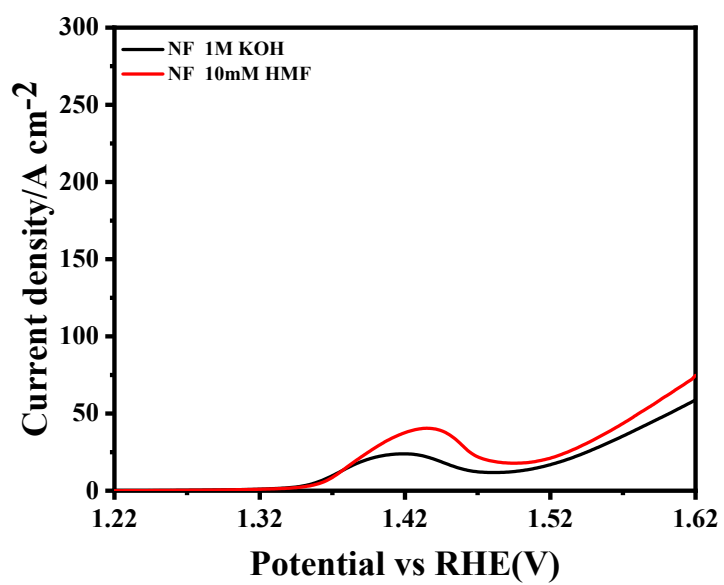

**Fig. S17.** Polarization curves of NF in 1.0 M KOH and 1.0 M KOH with 10 mM HMF after CV.

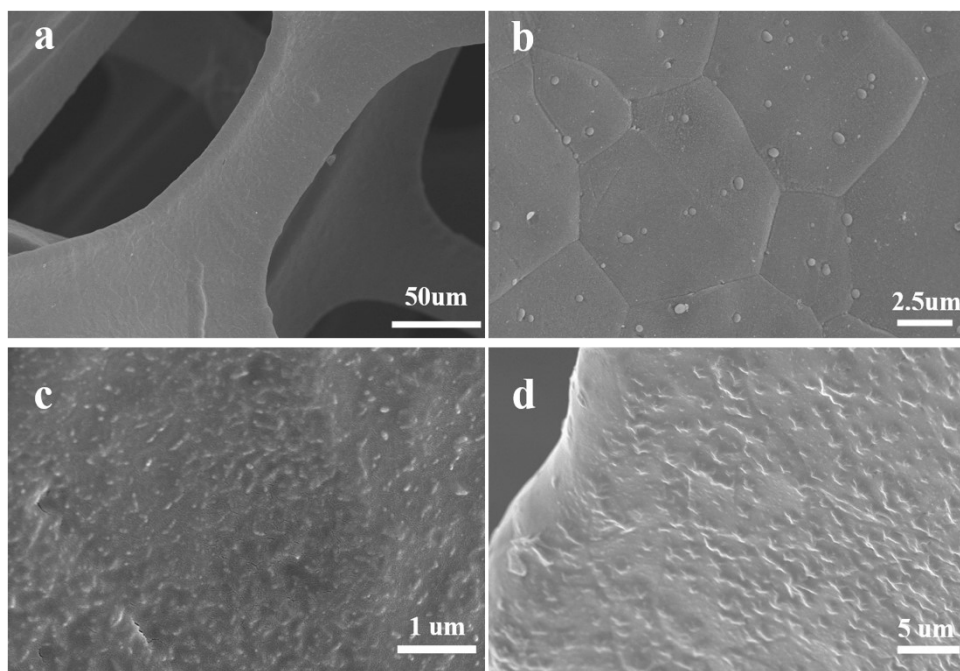

**Fig. S18.** SEM images of bare NF electrode a, b) before CV activation; c, d) after CV activation.

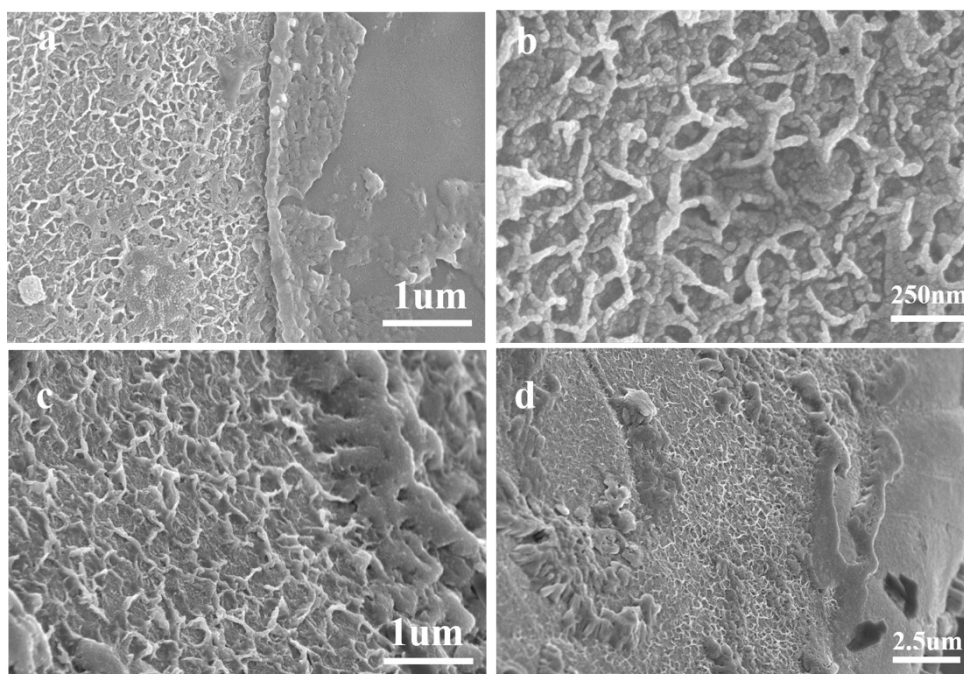

**Fig. S19.** SEM images of after CV activation. a, b) NSOC/NF electrode; c, d) Ni<sub>3</sub>S<sub>2</sub>@NSOC/NF electrode.

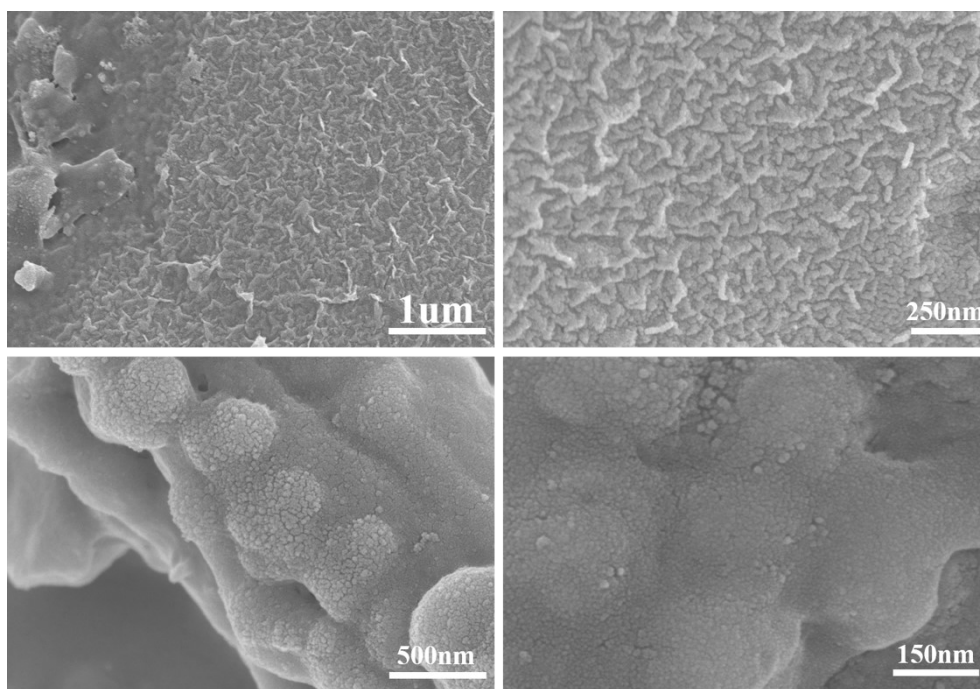

**Fig. S20.** SEM images of  $\text{Co}_9\text{S}_8\text{-Ni}_3\text{S}_2@\text{NSOC}/\text{NF}$  electrode after CV activation.

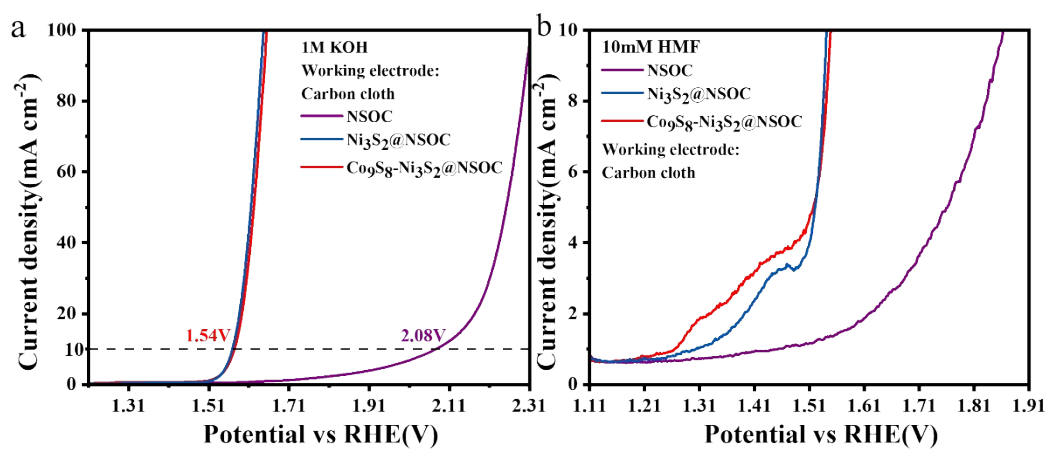

**Fig. S21.** a) LSV curves for  $\text{Co}_9\text{S}_8\text{-Ni}_3\text{S}_2@\text{NSOC}/\text{CC}$ ,  $\text{Ni}_3\text{S}_2@\text{NSOC}/\text{CC}$  and  $\text{NSOC}/\text{CC}$  in 1 M KOH without HMF (10 mM) and b) with 10 mM HMF (scan rate,  $5 \text{ mV s}^{-1}$ )

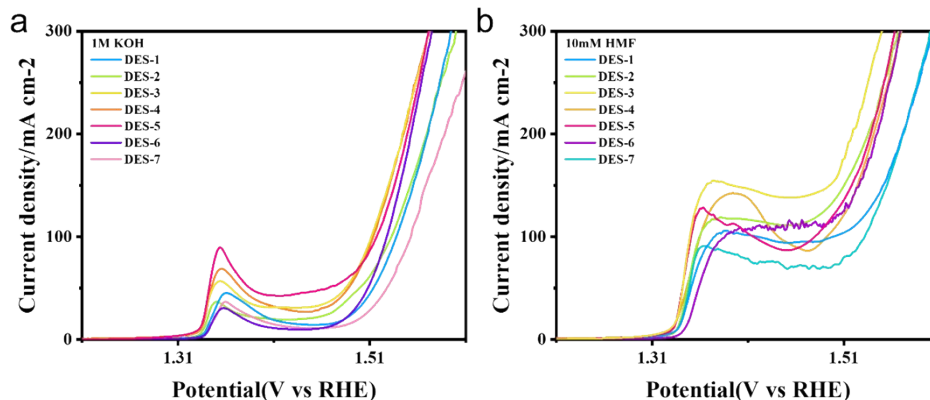

**Fig. S22.** a) The polarization curves of the samples obtained from DES at different molar ratio (DES-1~DES-7 as precursors, 3 h, 400 °C) in 1.0M KOH solution, and b) Polarization curves in 1.0 M KOH with 10 mM HMF.

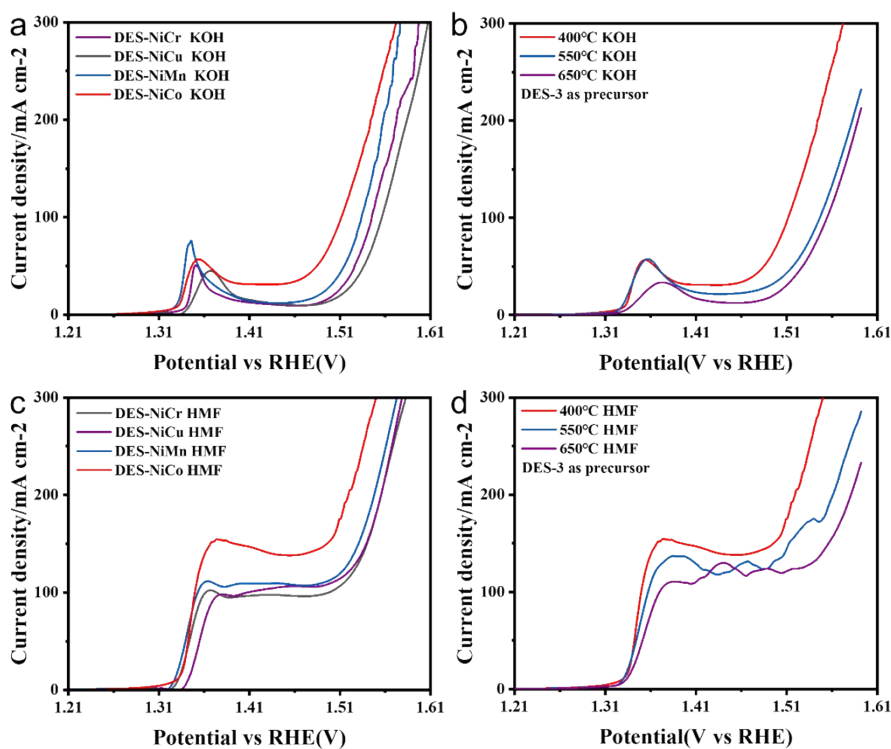

**Fig. S23.** a, b) The polarization curves of samples obtained from DES at different elements, different pyrolysis temperatures in 1.0 M KOH solution and c, d) Polarization curves in 1.0 M KOH with 10 mM HMF.

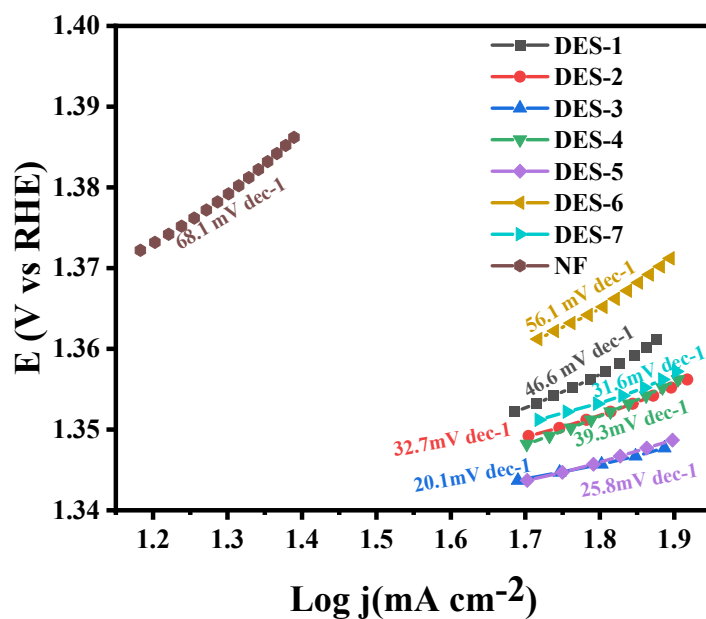

**Fig. S24.** Tafel slopes of the samples obtained from DES at different molar ratio (DES-1~DES-7 as precursors, 3 h, 400 °C) and bare NF.

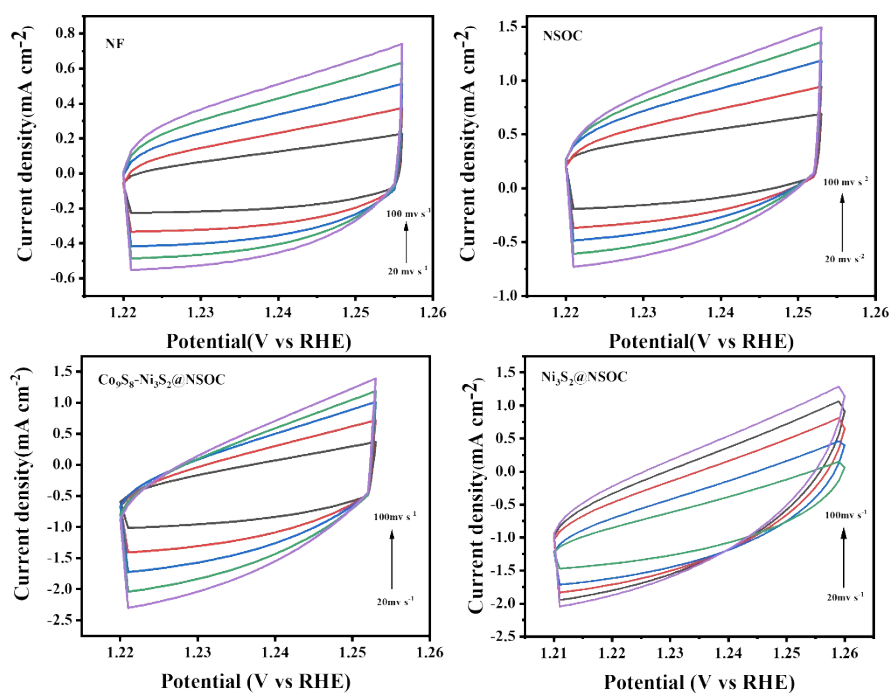

**Fig. S25.** Cyclic voltammetry of catalysts (1.21-1.26 V vs. RHE) at different scan rate.

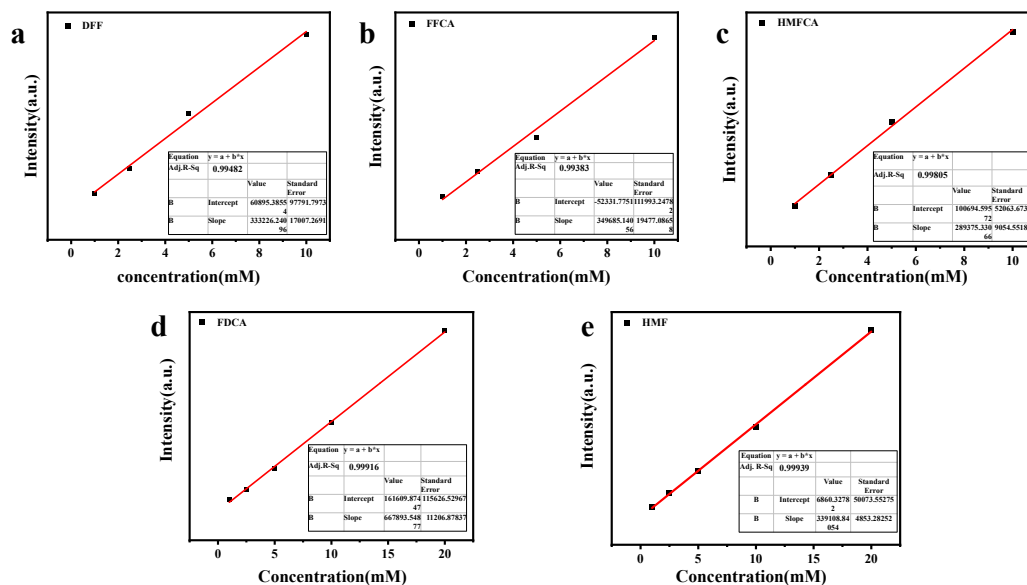

**Fig. S26.** HPLC standard curve measurements of pure a) DFF, b) FDCA, c) HMFCA, d) FDCA and e) HMF.

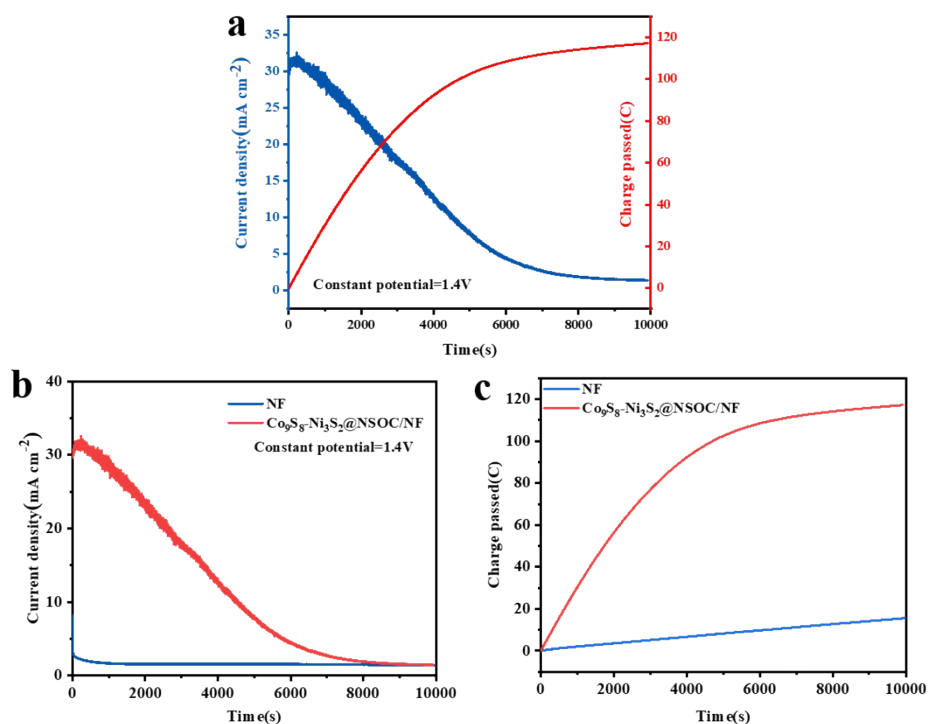

**Fig. S27.** a) Controlled potential electrolysis of  $\text{Co}_9\text{S}_8\text{-Ni}_3\text{S}_2\text{@NSOC/NF}$ , b) current vs time and c) The comparison of charge vs time for  $\text{Co}_9\text{S}_8\text{-Ni}_3\text{S}_2\text{@NSOC/NF}$  (red) and NF (blue) during the electrolysis at a constant potential of 1.4 V vs RHE in 1 M KOH with the presence of 10 mM HMF.

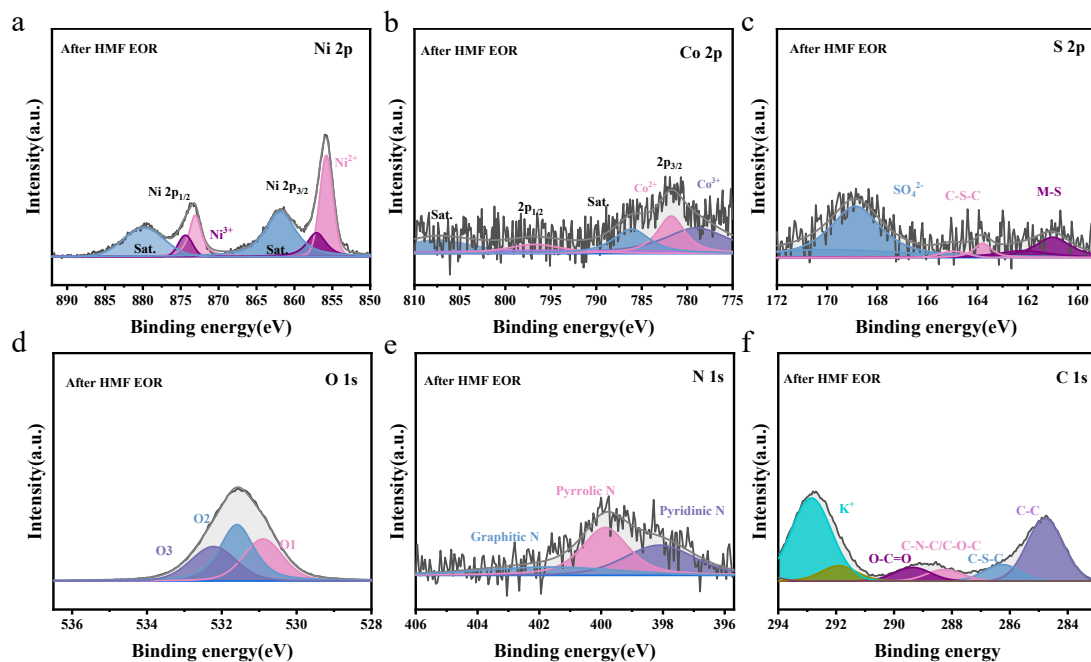

**Fig. S28.** XPS spectra a) Ni 2p, b) Co 2p, c) S 2p, d) O 1s, e) N 1s and f) C 1s of the  $\text{Co}_9\text{S}_8\text{-Ni}_3\text{S}_2\text{@NSOC/NF}$  after HMF EOR.



**Table S1.** Relevant reagents, sources of different proportions, and Co sources for the prepared samples.

| Sample | PEG200 (g) | NiCl <sub>2</sub> .6H <sub>2</sub> O (mmol) | CoCl <sub>2</sub> .6H <sub>2</sub> O (mmol) | Thiourea (mmol) | (400 °C/3 h/N <sub>2</sub> )<br>One-step pyrolysis                   |
|--------|------------|---------------------------------------------|---------------------------------------------|-----------------|----------------------------------------------------------------------|
| DES-1  | 6          | 0                                           | 0                                           | 5               | NSOC                                                                 |
| DES-2  | 6          | 5                                           | 0                                           | 5               | Ni <sub>3</sub> S <sub>2</sub> @NSOC                                 |
| DES-3  | 6          | 4.5                                         | 0.5                                         | 5               | Co <sub>9</sub> S <sub>8</sub> -Ni <sub>3</sub> S <sub>2</sub> @NSOC |
| DES-4  | 6          | 3.75                                        | 1.25                                        | 5               | CoS <sub>x</sub> -NiS <sub>x</sub> @NSOC                             |
| DES-5  | 6          | 2.5                                         | 2.5                                         | 5               | CoS <sub>x</sub> -NiS <sub>x</sub> @NSOC                             |
| DES-6  | 6          | 2                                           | 3                                           | 5               | CoS <sub>x</sub> -NiS <sub>x</sub> @NSOC                             |
| DES-7  | 6          | 0                                           | 5                                           | 5               | Co <sub>9</sub> S <sub>8</sub> @NSOC                                 |

**Table S2.** Elemental analysis results of the catalysts.

| Catalysts                                                            | N (wt%) | C (wt%) | H (wt%) | S (wt%) | Ni (wt%) | Co (wt%) |
|----------------------------------------------------------------------|---------|---------|---------|---------|----------|----------|
| NSOC                                                                 | 3.1     | 74.6    | 1.3     | 0.7     | ---      | ---      |
| Ni <sub>3</sub> S <sub>2</sub> @NSOC                                 | 2.8     | 33.8    | 1.7     | 12.7    | 32.4     | ---      |
| Co <sub>9</sub> S <sub>8</sub> -Ni <sub>3</sub> S <sub>2</sub> @NSOC | 2.6     | 30.9    | 1.4     | 13.9    | 29.9     | 5.9      |
| Co <sub>9</sub> S <sub>8</sub> @NSOC                                 | 3.2     | 32.3    | 1.5     | 14.1    | ---      | 31.2     |

**Table S3.** The polarization curve potential of the prepared catalyst in 1M KOH or 10 mM HMF on nickel foam (NF)

| Precursor | OER (V) <sup>a</sup>     |                           | HMF EOR (V) <sup>a</sup> |                          |                           | $\Delta E$ (mV) <sup>b</sup> |                           |
|-----------|--------------------------|---------------------------|--------------------------|--------------------------|---------------------------|------------------------------|---------------------------|
|           | 10<br>mA/cm <sup>2</sup> | 100<br>mA/cm <sup>2</sup> | 10<br>mA/cm <sup>2</sup> | 50<br>mA/cm <sup>2</sup> | 100<br>mA/cm <sup>2</sup> | 10<br>mA/cm <sup>2</sup>     | 100<br>mA/cm <sup>2</sup> |
| DES-7     | 1.343                    | 1.555                     | 1.338                    | 1.352                    | 1.534                     | 5                            | 21                        |
| DES-6     | 1.345                    | 1.530                     | 1.346                    | 1.361                    | 1.389                     | -1                           | 141                       |
| DES-5     | 1.335                    | 1.520                     | 1.338                    | 1.344                    | 1.353                     | -3                           | 167                       |
| DES-4     | 1.336                    | 1.517                     | 1.333                    | 1.348                    | 1.363                     | 3                            | 154                       |
| DES-3     | 1.335                    | 1.514                     | 1.330                    | 1.345                    | 1.352                     | 5                            | 162                       |
| DES-2     | 1.343                    | 1.540                     | 1.339                    | 1.353                    | 1.362                     | 4                            | 163                       |
| DES-1     | 1.340                    | 1.535                     | 1.338                    | 1.349                    | 1.377                     | 2                            | 173                       |
| NF        | 1.363                    | 1.690                     | 1.365                    | 1.573                    | 1.651                     | -2                           | 39.0                      |

<sup>a</sup>)(V) are the potentials at 10 and 100 mA cm<sup>-2</sup>, respectively, recorded under stirring at room temperature with 90% iR-correction. <sup>b</sup>) $\Delta E$  represents the difference between KOH and HMF.

**Table S4.** The HMF EOR performance of the different catalysts.

| Performance Catalysts | Parameters                           | NSOC /NF        | Ni <sub>3</sub> S <sub>2</sub> @NSOC /NF | Co <sub>9</sub> S <sub>8</sub> -Ni <sub>3</sub> S <sub>2</sub> @NSOC /NF |
|-----------------------|--------------------------------------|-----------------|------------------------------------------|--------------------------------------------------------------------------|
| HMF EOR               | $\eta_{10}$ , $\eta_{100}$ (V)       | 1.338,<br>1.377 | 1.339,<br>1.362                          | 1.330,<br>1.352                                                          |
|                       | Tafel slopes (mV dec <sup>-1</sup> ) | 46.6            | 32.7                                     | 20.1                                                                     |
|                       | Conversion (%)                       | 90.4            | 94.8                                     | 99.5                                                                     |
|                       | Selectivity (%)                      | 87              | 90.7                                     | 98.8                                                                     |
|                       | FE (%)                               | 86.8            | 90.5                                     | 98.6                                                                     |

**Table S5.** The comparison of activity for  $\text{Co}_9\text{S}_8\text{-Ni}_3\text{S}_2@\text{NSOC}$  and other reported catalysts.

| Electrode Materials                                       | Electrolysis potential | FDCA yield | Faradaic efficiency | Catalyst loading          | Catalyst substrate    | Ref.      |
|-----------------------------------------------------------|------------------------|------------|---------------------|---------------------------|-----------------------|-----------|
| $\text{Co}_9\text{S}_8\text{-Ni}_3\text{S}_2@\text{NSOC}$ | 1.40 V                 | 98.8%      | 98.6%               | $0.3 \text{ mg.cm}^{-2}$  | Nickel foam           | This work |
| NSOC                                                      | 1.40 V                 | 87%        | 86.8%               | $0.3 \text{ mg.cm}^{-2}$  | Nickel foam           | This work |
| BNC-2                                                     | 1.90 V                 | 57%        | ---                 | $0.3 \text{ mg.cm}^{-2}$  | carbon paper          | 1         |
| S-Ni@C                                                    | 1.473 V                | 96%        | 96%                 | $3.0 \text{ mg.cm}^{-2}$  | carbon paper          | 2         |
| $\text{MoO}_2\text{-FeP@C}$                               | 1.424 V                | 98%        | 97.8%               | $1.9 \text{ mg.cm}^{-2}$  | Nickel foam           | 3         |
| P-HEOs                                                    | 1.50 V                 | 97.4%      | 96.6%               | $0.8 \text{ mg.cm}^{-2}$  | carbon paper          | 4         |
| $\text{Ni}_{0.9}\text{Cu}_{0.1}(\text{OH})_2$             | 1.45 V                 | 91.2%      | 91.2%               | $1.0 \text{ mg.cm}^{-2}$  | carbon paper          | 5         |
| NiBx@NF                                                   | 1.64 V                 | 99%        | 99.5%               | $2.47 \text{ mg.cm}^{-2}$ | Nickel foam           | 6         |
| $\text{CuCo}_2\text{O}_4$                                 | 1.45 V                 | 93.70%     | 94%                 | ---                       | Nickel foam           | 7         |
| $\text{Ni}_3\text{S}_2/\text{NF}$                         | 1.423 V                | 100%       | 98%                 | ---                       | Nickel foam           | 8         |
| $\text{Ni}_2\text{P}/\text{NF}$                           | 1.423 V                | 100%       | ~100 %              | ---                       | Nickel foam           | 9         |
| CoFe@NiFe                                                 | 1.40V                  | 100%       | 99.8%               | ---                       | Nickel foam           | 10        |
| $\text{NiCo}_2\text{O}_4$                                 | 1.43V                  | 90.80%     | 87.50%              | ---                       | Nickel foam           | 11        |
| NiSe@NiO <sub>x</sub>                                     | 1.423V                 | ~99%       | ~99%                | ---                       | Nickel foam           | 12        |
| $\text{Co}_3\text{O}_4$ NW/NF                             | 1.469V                 | 96.8%      | 95.9%               | ---                       | Nickel foam           | 13        |
| CoNiFe LDH                                                | 1.55V                  | 84.9%      | ~90%                | ---                       | Carbon fiber<br>paper | 14        |

## References

1. Q. Qin, T. Heil, J. Schmidt, M. Schmallegger, G. Gescheidt, M. Antonietti and M. Oschatz, *Applied Energy Materials*, 2019, **2**, 8359-8365.
2. F. Kong and M. Wang, *ACS Appl. Energy Mater.*, 2021, **4**, 1182-1188.
3. G. Yang, Y. Jiao, H. Yan, Y. Xie, A. Wu, X. Dong, D. Guo, C. Tian and H. Fu, *Adv. Mater.*, 2020, **32**, 2000455.
4. K. Gu, D. Wang, C. Xie, T. Wang, G. Huang, Y. Liu, Y. Zou, L. Tao and S. Wang, *Angew. Chem. Int. Ed.*, 2021, **60**, 20253-20258.
5. J. Zhang, P. Yu, G. Zeng, F. Bao, Y. Yuan and H. Huang, *J. Mater. Chem. A*, 2021, **9**, 9685-9691.
6. P. Zhang, X. Sheng, X. Chen, Z. Fang, J. Jiang, M. Wang, F. Li, L. Fan, Y. Ren, B. Zhang, B. J. J. Timmer, M. S. G. Ahlquist and L. Sun, *Angew. Chem. Int. Ed.*, 2019, **58**, 9155-9159.
7. Y. Lu, C.-L. Dong, Y.-C. Huang, Y. Zou, Z. Liu, Y. Liu, Y. Li, N. He, J. Shi and S. Wang, *Angew. Chem. Int. Ed.*, 2020, **59**, 19215-19221.
8. B. You, X. Liu, N. Jiang and Y. Sun, *J. Am. Chem. Soc.*, 2016, **138**, 13639-13646.
9. B. You, N. Jiang, X. Liu and Y. Sun, *Angew. Chem. Int. Ed.*, 2016, **55**, 9913-9917.
10. Y. Xie, Z. Zhou, N. Yang and G. Zhao, *Adv. Funct. Mater.*, 2021, **31**, 2102886.
11. M. J. Kang, H. Park, J. Jegal, S. Y. Hwang, Y. S. Kang and H. G. Cha, *Appl. Catal. B*, 2019, **242**, 85-91.
12. L. Gao, Z. Liu, J. Ma, L. Zhong, Z. Song, J. Xu, S. Gan, D. Han and L. Niu, *Appl. Catal. B*, 2020, **261**, 118235.
13. Z. Zhou, C. Chen, M. Gao, B. Xia and J. Zhang, *Green Chem.*, 2019, **21**, 6699-6706.
14. M. Zhang, Y. Liu, B. Liu, Z. Chen, H. Xu and K. Yan, *ACS Catal.*, 2020, **10**, 5179-5189.
